# Supplementary material for: Oral and Injected Tamoxifen Alter Adult Hippocampal Neurogenesis in Female and Male Mice
Source: eNeuro. 2022 Apr 19;9(2):ENEURO.0422-21.2022. doi: 10.1523/ENEURO.0422-21.2022 (PMC9034758; doi:10.1523/ENEURO.0422-21.2022)
Supplement: Figure 2-1 — Raw data supporting Figure 2. Download Figure 2-1, XLSX file. [file enu-eN-MNT-0422-21-s03.xlsx]

## Sheet: Fig 2
				in DG only									in whole hippocampus
group	mouse	sex	Cre source	EYFP+ cells	area sampled (um2)	EYFP+ density	% of RGLs that are EYFP+	% of IPCs that are EYFP+	% of EYFP+ cells that are RGLs	% of EYFP+ cells that are IPCs	% of EYFP+ cells that are astrocytes	% of EYFP+ cells that are dcx+	%of EYFP+ in DG	%of EYFP+ in CA3	%of EYFP+ in CA3
Inject-d7	133	m	maternal	22	33585	0.000655054	0.343386	0.27817	0.272727	0.5	0	0.28	0.956005	0	0.0439948
Inject-d7	134	m	maternal	73	37234	0.00196057	0.769216	1.23075	0.246575	0.575342	0.0273973	0.293333	0.922782	0.00120652	0.076011
Inject-d7	135	m	maternal	78	34077	0.00228893	0.832003	0.848982	0.230769	0.461538	0.0128205	0.4	0.931365	0.00183025	0.0668043
Inject-d7	139	m	paternal	63	211894	0.000297318	0.219347	0.122834	0.396825	0.444444	0.047619	0.253333	0.969055	0	0.0309454
Inject-d7	140	m	paternal	101	138440	0.000729558	0.533928	0.240542	0.425743	0.485149	0	0.346667	0.953272	0.00584101	0.0408871
Inject-d7	141	f	maternal	114	191548	0.000595151	0.316195	0.231406	0.289474	0.561404	0.0350877	0.16	0.962042	0	0.0379585
Inject-d7	142	f	maternal	63	166384	0.000378642	0.3255	0.131959	0.412698	0.412698	0.15873	0.14	0.981689	0.00305175	0.0152588
Inject-d7	149	f	paternal	65	153418	0.000423679	0.387842	0.159699	0.261538	0.538462	0.0461538	0.133333	0.95087	0	0.0491303
Inject-d7	150	f	paternal	107	79691	0.00134269	0.690357	0.641939	0.252336	0.551402	0.0186916	0.386667	0.941985	0.00400105	0.0540141
Inject-d7	156	f	paternal	93	99759	0.000932247	0.33735	0.330016	0.225806	0.376344	0.0537634	0.213333	0.968323	0	0.0316768
Inject-d14	132	f	maternal	60	29211	0.00205402	0.429884	0.728933	0.0666667	0.433333	0.0333333	0.48	0.974955	0.000834834	0.0242102
Inject-d14	136	f	paternal	67	43258	0.00154885	0.4785	0.674808	0.19403	0.597015	0	0.453333	0.969243	0.00153787	0.0292195
Inject-d14	137	f	paternal	110	45382	0.00242387	0.689664	0.75863	0.136364	0.5	0.0272727	0.64	0.961412	0.000876997	0.0377109
Inject-d14	138	f	paternal	44	42571	0.00103357	0.419513	0.337657	0.227273	0.340909	0	0.6	0.941009	0	0.0589908
Inject-d14	162	m	paternal	117	79231	0.00147669	0.444063	0.560788	0.17094	0.444444	0.00854701	0.6	0.968194	0	0.0318063
Inject-d14	163	m	paternal	73	183616	0.000397569	0.277869	0.173067	0.232877	0.410959	0	0.466667	0.936964	0	0.0630361
Inject-d14	164	m	paternal	84	54450	0.0015427	0.5564	0.744895	0.166667	0.488095	0.0119048	0.586667	0.964701	0.00415288	0.0311466
Inject-d14	165	m	paternal	84	47233	0.00177842	0.689956	0.480878	0.261905	0.380952	0	0.453333	0.948743	0	0.051257
Inject-d14	166	m	paternal	71	53189	0.00133486	0.466884	0.578993	0.197183	0.478873	0	0.44	0.939124	0	0.0608758
Inject-d14	169	m	paternal	68	144097	0.000471904	0.181771	0.154505	0.176471	0.25	0	0.733333	0.963197	0.00460038	0.0322026
Inject-d14	170	m	paternal	87	53737	0.001619	0.555201	0.95689	0.16092	0.505747	0.0114943	0.573333	0.969437	0	0.0305625
Chow-11d	144	m	maternal	62	172128	0.000360197	0.168049	0.163107	0.290323	0.435484	0.193548	0.09375	0.92962	0.0255928	0.0447874
Chow-11d	146	m	paternal	60	210087	0.000285596	0.124329	0.158806	0.283333	0.633333	0	0.166667	0.874571	0	0.125429
Chow-11d	148	m	paternal	57	228239	0.000249738	0.164912	0.11125	0.368421	0.438596	0.0877193	0.133333	0.902795	0.0149547	0.0822507
Chow-11d	160	f	paternal	84	111304	0.00075469	0.32851	0.471206	0.238095	0.607143	0.0119048	0.293333	0.936815	0.00197454	0.0612107
Chow-11d	161	f	paternal	82	252717	0.000324474	0.207937	0.118949	0.365854	0.463415	0	0.230769	0.945983	0	0.0540174
Chow-11d	167	f	paternal	133	70982	0.00187371	0.59481	1.08255	0.18797	0.684211	0.0150376	0.24	0.983504	0	0.0164961
Chow-11d	186	m	maternal	27	236542	0.000114145	0.0644925	0.0690991	0.259259	0.555556	0	0.319149	0.881946	0.0196757	0.0983787
Chow-14d	157	m	paternal	105	112272	0.000935229	0.112625	0.483777	0.0571429	0.6	0.0380952	0.24	0.942736	0.00238601	0.0548782
Chow-14d	158	m	paternal	59	85016	0.000693987	0.349461	0.648998	0.20339	0.661017	0	0.266667	0.950917	0	0.0490826
Chow-14d	159	m	paternal	68	182687	0.000372221	0.150331	0.223748	0.220588	0.705882	0	0.173333	0.938179	0.00618215	0.0556393
Chow-14d	174	f	maternal	50	118941	0.000420376	0.197775	0.167419	0.3	0.52	0	0.213333	0.958927	0	0.041073
Chow-14d	175	f	maternal	58	168060	0.000345115	0.132736	0.206861	0.241379	0.62069	0	0.266667	0.988055	0	0.011945
Chow-14d	176	f	maternal	57	181066	0.000314802	0.174275	0.129346	0.333333	0.561404	0	0.373333	0.925163	0.0124728	0.0623638
Chow-14d	177	f	maternal	38	160646	0.000236545	0.0733339	0.161711	0.157895	0.631579	0	0.263158	0.945206	0.0273969	0.0273969
Chow-14d	179	f	maternal	69	110596	0.000623892	0.0789392	0.27967	0.101449	0.608696	0	0.413333	0.952238	0	0.0477617
Chow-14d	178	m	maternal	45	209936	0.000214351	0.04779	0.0866079	0.133333	0.488889	0	0.414634	0.957213	0	0.0427868
Chow-14d	180	m	maternal	60	177588	0.000337861	0.127599	0.182668	0.166667	0.566667	0	0.24	0.927079	0.024307	0.048614
Chow-14d	181	m	maternal	68	222729	0.000305304	0.0732993	0.129792	0.205882	0.544118	0.0294118	0.161765	0.897664	0.0307008	0.0716351

## Sheet: Fig 4
group	mouse	sex	Total EDU+ only	Total EDU+/SOX2+	Total EDU+/SOX2+/GFAP+	TOTAL all EDU+	area sampled for EdU counts	density EdU+ only	density EdU+/Sox2+	density EdU+/Sox2+/GFAP+	density all EdU+		SOX2+/GFAP-	SOX2+/GFAP+	area sampled for Sox2 counts	density Sox2+/GFAP-	density Sox2+/GFAP+		total BrdU	area sampled for BrdU counts	brdu density		dcx only	neun only	both	neither	all dcx	all neun	% dcx only	% neun only	% dcx+ and neun+	% neither	% dcx all	%neun all
TAM inject	101	f	1	22	1	24	215838	4.6331e-06	0.000101928	4.6331e-06	0.000111194		37	41	39565.8	0.000935151	0.00103625		85	248696	0.000341782		4	11	42	28	46	53	4.70588	12.9412	49.4118	32.9412	54.1176	62.3529
TAM inject	102	f	2	11	0	13	145590	1.37372e-05	7.55544e-05	0	8.92916e-05		25	18	26315.9	0.000949997	0.000683998		56	251274	0.000222864		2	11	23	20	25	34	3.57143	19.6429	41.0714	35.7143	44.6429	60.7143
TAM inject	104	f	2	21	3	26	220245	9.08079e-06	9.53483e-05	1.36212e-05	0.00011805		32	42	39608.8	0.000807901	0.00106037		66	250512	0.00026346		1	15	31	19	32	46	1.51515	22.7273	46.9697	28.7879	48.4848	69.697
TAM inject	105	f	3	26	6	35	235951	1.27145e-05	0.000110192	2.5429e-05	0.000148336		36	28	39354.1	0.00091477	0.000711488		74	247732	0.00029871		1	20	30	23	31	50	1.35135	27.027	40.5405	31.0811	41.8919	67.5676
TAM inject	106	f	8	20	1	29	255236	3.13435e-05	7.83588e-05	3.91794e-06	0.00011362		26	29	39718.8	0.000654602	0.000730133		44	212575	0.000206986		1	10	24	9	25	34	2.27273	22.7273	54.5455	20.4545	56.8182	77.2727
TAM inject	107	m	0	16	5	21	215238	0	7.43364e-05	2.32301e-05	9.75665e-05		46	32	39468.1	0.0011655	0.000810782		58	253800	0.000228527		0	10	24	24	24	34	0	17.2414	41.3793	41.3793	41.3793	58.6207
TAM inject	108	m	1	10	0	11	212719	4.70103e-06	4.70103e-05	0	5.17114e-05		36	36	39876	0.0009028	0.0009028		43	212725	0.000202139		0	7	22	14	22	29	0	16.2791	51.1628	32.5581	51.1628	67.4419
TAM inject	109	m	0	16	0	16	232740	0	6.87462e-05	0	6.87462e-05		37	24	40019.2	0.000924557	0.000599713		60	259147	0.000231529		2	13	22	23	24	35	3.33333	21.6667	36.6667	38.3333	40	58.3333
TAM inject	110	m	2	19	0	21	239142	8.36322e-06	7.94505e-05	0	8.78138e-05		43	38	40157.9	0.00107077	0.000946265		70	238695	0.000293261		2	16	32	20	34	48	2.85714	22.8571	45.7143	28.5714	48.5714	68.5714
TAM inject	111	m	1	20	1	22	240179	4.16356e-06	8.32712e-05	4.16356e-06	9.15983e-05		25	29	39812	0.000627951	0.000728423		52	254126	0.000204623		3	6	28	15	31	34	5.76923	11.5385	53.8462	28.8462	59.6154	65.3846
TAM inject	112	m	0	23	2	25	231943	0	9.91624e-05	8.62281e-06	0.000107785		31	35	39988.6	0.000775222	0.00087525		74	312817	0.00023656		1	17	35	21	36	52	1.35135	22.973	47.2973	28.3784	48.6486	70.2703
Veh inject	113	f	0	32	0	32	229823	0	0.000139238	0	0.000139238		51	44	39501.1	0.0012911	0.00111389		45	257523	0.000174742		0	6	25	14	25	31	0	13.3333	55.5556	31.1111	55.5556	68.8889
Veh inject	114	f	0	35	0	35	219217	0	0.000159659	0	0.000159659		43	48	39536.9	0.00108759	0.00121405		71	261256	0.000271764		3	10	34	24	37	44	4.22535	14.0845	47.8873	33.8028	52.1127	61.9718
Veh inject	115	f	0	39	1	40	247773	0	0.000157402	4.03595e-06	0.000161438		47	42	39578.3	0.00118752	0.00106119		59	248327	0.00023759		0	9	23	27	23	32	0	15.2542	38.9831	45.7627	38.9831	54.2373
Veh inject	116	f	6	15	0	21	245569	2.4433e-05	6.10826e-05	0	8.55157e-05		36	31	39764.5	0.00090533	0.00077959		58	236849	0.000244882		3	9	24	22	27	33	5.17241	15.5172	41.3793	37.931	46.5517	56.8966
Veh inject	117	f	0	25	0	25	247365	0	0.000101065	0	0.000101065		51	40	39405.7	0.00129423	0.00101508		51	249900	0.000204082		4	4	26	17	30	30	7.84314	7.84314	50.9804	33.3333	58.8235	58.8235
Veh inject	118	f	1	29	0	30	246000	4.06504e-06	0.000117886	0	0.000121951		41	38	39466.5	0.00103885	0.000962841		69	257632	0.000267824		2	17	35	15	37	52	2.89855	24.6377	50.7246	21.7391	53.6232	75.3623
Veh inject	119	m	1	29	1	31	246934	4.04967e-06	0.00011744	4.04967e-06	0.00012554		46	33	39683.9	0.00115916	0.000831572		53	257122	0.000206128		5	11	27	10	32	38	9.43396	20.7547	50.9434	18.8679	60.3774	71.6981
Veh inject	120	m	3	20	0	23	160188	1.87279e-05	0.000124853	0	0.000143581		37	27	26404.8	0.00140126	0.00102254		42	249014	0.000168665		0	7	26	9	26	33	0	16.6667	61.9048	21.4286	61.9048	78.5714
Veh inject	121	m	1	32	3	36	221753	4.50952e-06	0.000144305	1.35285e-05	0.000162343		50	31	39985.5	0.00125045	0.000775282		51	265983	0.000191742		3	8	24	16	27	32	5.88235	15.6863	47.0588	31.3725	52.9412	62.7451
Veh inject	122	m	0	20	0	20	224820	0	8.896e-05	0	8.896e-05		61	30	39529.4	0.00154316	0.000758929		60	258444	0.000232158		2	5	33	20	35	38	3.33333	8.33333	55	33.3333	58.3333	63.3333
Veh inject	123	m	0	26	1	27	231801	0	0.000112165	4.31405e-06	0.000116479		30	38	39506.5	0.000759368	0.000961867		54	244698	0.00022068		4	8	26	16	30	34	7.40741	14.8148	48.1481	29.6296	55.5556	62.963
Veh inject	124	m	7	31	0	38	222486	3.14626e-05	0.000139334	0	0.000170797		47	29	39644.1	0.00118555	0.000731508		48	201593	0.000238104		2	11	21	14	23	32	4.16667	22.9167	43.75	29.1667	47.9167	66.6667

## Sheet: Fig 6
group	mouse	sex	Total EDU+ only	Total EDU+/SOX2+	Total EDU+/SOX2+/GFAP+	TOTAL all EDU+	area sampled for EdU counts	density EdU+ only	density EdU+/Sox2+	density EdU+/Sox2+/GFAP+	density all EdU+		SOX2+/GFAP-	SOX2+/GFAP+	area sampled for Sox2 counts	density Sox2+/GFAP-	density Sox2+/GFAP+		total BrdU	area sampled for BrdU counts	brdu density		dcx only	neun only	both	neither	all dcx	all neun	% dcx only	% neun only	% dcx+ and neun+	% neither	% dcx all	%neun all
TAM chow	201	f	1	18	1	20	262050	3.81606e-06	6.86891e-05	3.81606e-06	7.63212e-05		32	36	39434.3	0.000811476	0.00091291		51	246689	0.000206738		9	9	19	14	28	28	17.6471	17.6471	37.2549	27.451	54.902	54.902
TAM chow	202	f	2	23	2	27	249434	8.01815e-06	9.22087e-05	8.01815e-06	0.000108245		43	57	39991.1	0.00107524	0.00142532		36	236352	0.000152315		1	6	13	16	14	19	2.77778	16.6667	36.1111	44.4444	38.8889	52.7778
TAM chow	203	f	0	21	3	24	260133	0	8.07278e-05	1.15325e-05	9.22604e-05		47	48	40150.4	0.0011706	0.0011955		72	244527	0.000294446		3	7	36	26	39	43	4.16667	9.72222	50	36.1111	54.1667	59.7222
TAM chow	204	f	1	32	4	37	238118	4.19959e-06	0.000134387	1.67984e-05	0.000155385		46	43	39668.1	0.00115962	0.00108399		78	241889	0.000322463		4	8	49	17	53	57	5.12821	10.2564	62.8205	21.7949	67.9487	73.0769
TAM chow	205	f	2	29	2	33	249245	8.02424e-06	0.000116351	8.02424e-06	0.0001324		50	44	39769.6	0.00125724	0.00110637		65	253021	0.000256896		6	4	28	27	34	32	9.23077	6.15385	43.0769	41.5385	52.3077	49.2308
TAM chow	207	m	0	23	0	23	249929	0	9.20262e-05	0	9.20262e-05		42	30	39513.7	0.00106292	0.000759231		57	242124	0.000235416		1	8	38	10	39	46	1.75439	14.0351	66.6667	17.5439	68.4211	80.7018
TAM chow	208	m	0	27	0	27	241849	0	0.00011164	0	0.00011164		44	34	39629.9	0.00111027	0.000857938		80	255066	0.000313644		7	14	33	26	40	47	8.75	17.5	41.25	32.5	50	58.75
TAM chow	209	m	1	26	1	28	257382	3.88528e-06	0.000101017	3.88528e-06	0.000108788		35	33	39569.5	0.000884519	0.000833975		33	248153	0.000132982		3	1	19	10	22	20	9.09091	3.0303	57.5758	30.303	66.6667	60.6061
TAM chow	210	m	1	24	0	25	247647	4.038e-06	9.6912e-05	0	0.00010095		52	36	39490.5	0.00131677	0.000911611		50	229716	0.00021766		5	6	25	14	30	31	10	12	50	28	60	62
TAM chow	211	m	1	22	0	23	235942	4.23833e-06	9.32432e-05	0	9.74815e-05		39	40	39654.6	0.000983493	0.00100871		47	268533	0.000175025		7	5	19	16	26	24	14.8936	10.6383	40.4255	34.0426	55.3191	51.0638
TAM chow	212	m	0	25	0	25	267856	0	9.33336e-05	0	9.33336e-05		42	46	39880.7	0.00105314	0.00115344		35	212992	0.000164325		2	3	16	14	18	19	5.71429	8.57143	45.7143	40	51.4286	54.2857
Veh chow	213	f	3	14	0	17	258352	1.1612e-05	5.41895e-05	0	6.58016e-05		22	33	40241.9	0.000546693	0.00082004		36	276847	0.000130036		4	5	12	15	16	17	11.1111	13.8889	33.3333	41.6667	44.4444	47.2222
Veh chow	214	f	1	24	1	26	244835	4.08438e-06	9.80251e-05	4.08438e-06	0.000106194		32	39	39562.8	0.000808841	0.000985775		51	241693	0.000211011		7	9	15	20	22	24	13.7255	17.6471	29.4118	39.2157	43.1373	47.0588
Veh chow	215	f	0	29	1	30	242245	0	0.000119713	4.12805e-06	0.000123842		42	49	40164.3	0.0010457	0.00121999		49	311423	0.000157342		8	2	16	23	24	18	16.3265	4.08163	32.6531	46.9388	48.9796	36.7347
Veh chow	216	f	1	30	0	31	282130	3.54447e-06	0.000106334	0	0.000109878		34	39	39560.8	0.000859437	0.000985824		47	249582	0.000188315		1	6	25	15	26	31	2.12766	12.766	53.1915	31.9149	55.3191	65.9574
Veh chow	217	f	0	20	0	20	229298	0	8.72229e-05	0	8.72229e-05		50	38	40008.1	0.00124975	0.000949807		24	262397	9.14645e-05		1	2	7	14	8	9	4.16667	8.33333	29.1667	58.3333	33.3333	37.5
Veh chow	218	f	3	43	0	46	205853	1.45735e-05	0.000208887	0	0.00022346		60	33	39892.6	0.00150404	0.00082722		67	215419	0.000311021		6	9	17	35	23	26	8.95522	13.4328	25.3731	52.2388	34.3284	38.806
Veh chow	219	m	0	12	0	12	83731.3	0	0.000143316	0	0.000143316		10	8	13466.8	0.000742569	0.000594055		32	209620	0.000152657		3	2	10	17	13	12	9.375	6.25	31.25	53.125	40.625	37.5
Veh chow	220	m	3	22	0	25	259857	1.15448e-05	8.46619e-05	0	9.62067e-05		49	44	39755.8	0.00123253	0.00110676		45	212546	0.000211719		2	8	14	21	16	22	4.44444	17.7778	31.1111	46.6667	35.5556	48.8889
Veh chow	221	m	1	35	3	39	264286	3.78378e-06	0.000132432	1.13513e-05	0.000147567		49	24	39665.2	0.00123534	0.000605064		45	229512	0.000196068		2	7	16	20	18	23	4.44444	15.5556	35.5556	44.4444	40	51.1111
Veh chow	222	m	0	35	0	35	267801	0	0.000130694	0	0.000130694		56	30	40579.4	0.00138001	0.000739291		43	225662	0.00019055		5	4	16	18	21	20	11.6279	9.30233	37.2093	41.8605	48.8372	46.5116
Veh chow	223	m	0	31	0	31	250077	0	0.000123962	0	0.000123962		45	24	39853.1	0.00112915	0.000602212		31	203680	0.0001522		3	2	13	13	16	15	9.67742	6.45161	41.9355	41.9355	51.6129	48.3871
Veh chow	224	m	6	15	1	22	248113	2.41826e-05	6.04564e-05	4.03043e-06	8.86694e-05		30	33	39616.1	0.000757267	0.000832994		36	180135	0.00019985		2	4	15	15	17	19	5.55556	11.1111	41.6667	41.6667	47.2222	52.7778
